# Supplementary material for: Elevated Expression of Toxin TisB Protects Persister Cells against Ciprofloxacin but Enhances Susceptibility to Mitomycin C
Source: MDPI journal article supplement (doi:10.3390/microorganisms9050943), 2021-04-27
Supplement: s1 [file s1]

## **Supplementary Materials**

### **Elevated expression of toxin TisB protects persister cells against ciprofloxacin but enhances susceptibility to mitomycin C**

Daniel Edelmann, Florian H. Leinberger, Nicole E. Schmid, Markus Oberpaul,  
Till F. Schäberle and Bork A. Berghoff

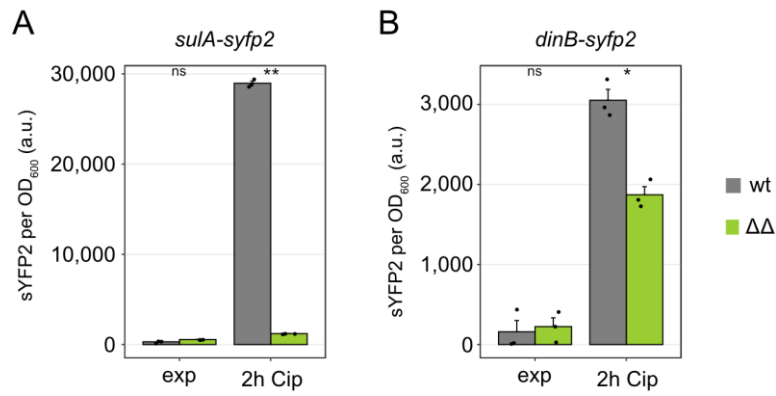

**Figure S1.** Induction of SOS genes upon ciprofloxacin.

sYFP2 fluorescence from chromosomal *sulA-syfp2* (A) and *dinB-syfp2* (B) fusions was monitored in a microplate reader. Reporter strains were analyzed during exponential phase (exp, OD<sub>600</sub> of ~0.4) and after two hours of Cip treatment (0.1 μg mL<sup>-1</sup>; 10x MIC). Fluorescence measurements were background-corrected and normalized to OD<sub>600</sub>. Bars represent the mean (± SEM; n=3). A pairwise *t*-test was performed to compare wt and ΔΔ (ns: not significant, \* p<0.05, \*\* p<0.01). (wt: wild type MG1655; ΔΔ: Δ1-41 Δ*istR*).

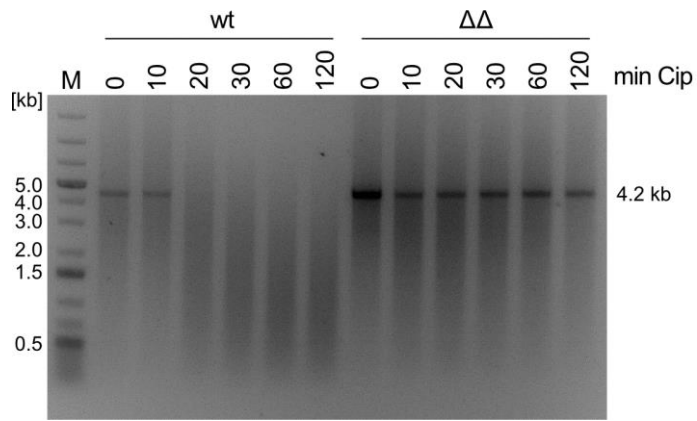

**Figure S2.** *Time course experiment for DNA damage analysis.*

Linearized plasmid DNA was analyzed on an agarose gel. Plasmid DNA was extracted from cultures in exponential phase ( $OD_{600}$  of  $\sim 0.4$ ) and at several time points of Cip treatment ( $1 \mu\text{g mL}^{-1}$ ; 100x MIC). A marker (M) in kb is shown on the left-hand side. (wt: wild type MG1655;  $\Delta\Delta$ :  $\Delta 1-41 \Delta istR$ ).

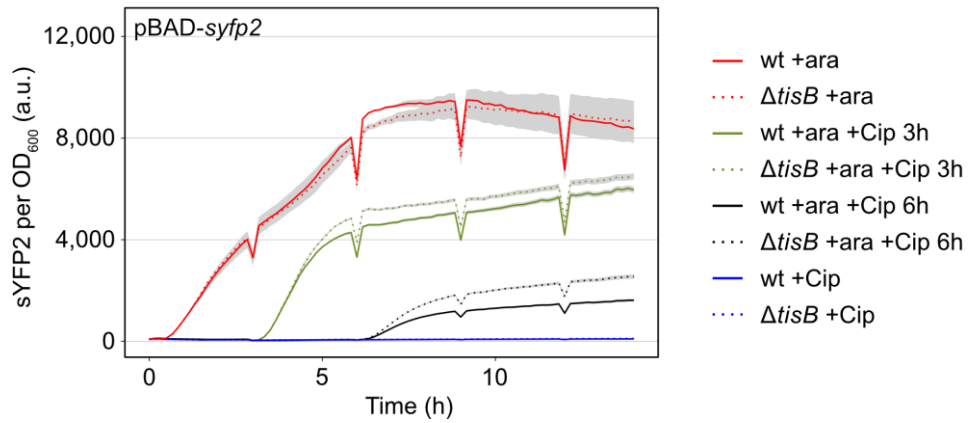

**Figure S3.** *sYFP2* expression upon prolonged ciprofloxacin treatment.

*sYFP2* fluorescence from plasmid pBAD-*syfp2* was monitored in a microplate reader. *sYFP2* expression was induced by 0.2% L-Ara (+ara) at the indicated time points during Cip treatment (0.1  $\mu\text{g mL}^{-1}$ ; 10x MIC). Treatments with L-ara or Cip alone served as controls. Fluorescence measurements were normalized to the corresponding OD<sub>600</sub> measurements. Data represents the mean (colored lines) and SEM (grey ribbons;  $n=3$ ). (wt: wild type MG1655;  $\Delta tisB$ : *tisB* deletion strain).

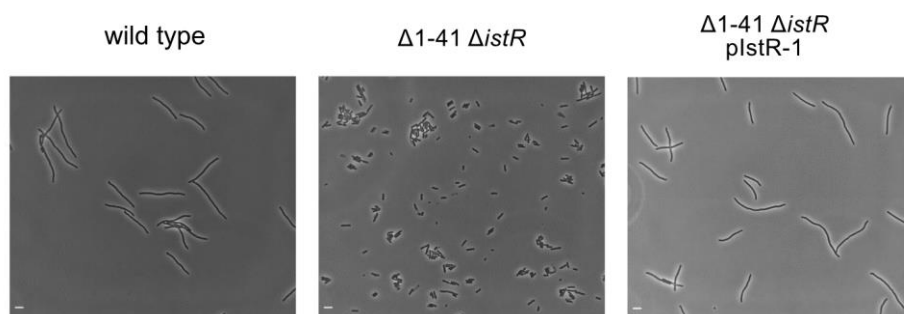

**Figure S4.** *Cell filamentation upon ciprofloxacin.*

Differential interference contrast (DIC) microscopy images of strains after two hours of Cip treatment ( $0.1 \mu\text{g mL}^{-1}$ ; 10x MIC). plstR-1 is an overexpression plasmid for RNA antitoxin IstR-1. Scale bars indicate  $5 \mu\text{m}$ .

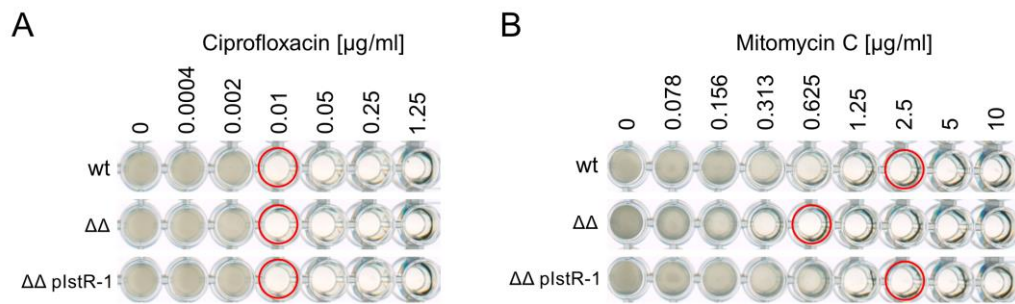

**Figure S5.** MIC determination for ciprofloxacin and mitomycin C.

Stationary-phase cultures were diluted 1:1,000 in fresh LB medium, and 135  $\mu\text{l}$  were transferred to each well of a 96-well microplate. Subsequently, 15  $\mu\text{l}$  of antibiotics were added to reach the final concentrations as indicated. Cells were cultivated at 37°C and 180 rpm for ~24 hours. The minimum inhibitory concentration (MIC) is reflected by the first well (red circle) in which cell growth was below 10% of the control (0  $\mu\text{g/ml}$ ), as assessed by  $\text{OD}_{600}$  measurements in a microplate reader. (wt: wild type MG1655;  $\Delta\Delta$ :  $\Delta 1\text{-}41 \Delta istR$ ;  $\Delta\Delta$  plstR-1:  $\Delta 1\text{-}41 \Delta istR$  with IstR-1 overexpression plasmid).

**Table S1. Strains and plasmids used in this study.**

| <b>Strain</b>      | <b>Relevant features</b>                                                                                                         | <b>Source/Reference</b> |
|--------------------|----------------------------------------------------------------------------------------------------------------------------------|-------------------------|
| MG1655             | K-12 F <sup>-</sup> λ <sup>-</sup>                                                                                               | Lab strain              |
| B047               | Δ <i>tisAB</i> :: <i>frt</i> in MG1655                                                                                           | [1]                     |
| B133               | Scarless deletion of +1-41 region of <i>tisB</i> 5'-UTR and deletion of <i>istR</i> (Δ1-41 Δ <i>istR</i> :: <i>frt-kan-frt</i> ) | [2]                     |
| B076               | MG1655 <i>sulA-syfp2-cat</i>                                                                                                     | [2]                     |
| GC-40              | MG1655 <i>dinB-syfp2-cat</i>                                                                                                     | This study              |
| NES3               | Δ1-41 Δ <i>istR</i> :: <i>frt-kan-frt sulA-syfp2-cat</i> (P1 from B076 to B133)                                                  | This study              |
| NES5               | Δ1-41 Δ <i>istR</i> :: <i>frt-kan-frt dinB-syfp2-cat</i> (P1 from GC-40 to B133)                                                 | This study              |
| GC-100             | Deletion of <i>recB</i> with <i>cat</i> (Δ <i>recB</i> :: <i>cat</i> ) in MG1655                                                 | This study              |
| GC-102             | Deletion of <i>ruvAB</i> with <i>cat</i> (Δ <i>ruvAB</i> :: <i>cat</i> ) in MG1655                                               | This study              |
| GC-103             | MG1655 Δ <i>recB</i> :: <i>cat</i> (P1 from GC-100 to MG1655)                                                                    | This study              |
| GC-106             | Δ1-41 Δ <i>istR</i> :: <i>frt-kan-frt ΔrecB</i> :: <i>cat</i> (P1 from GC-100 to B133)                                           | This study              |
| GC-105             | MG1655 Δ <i>ruvAB</i> :: <i>cat</i> (P1 from GC-102 to MG1655)                                                                   | This study              |
| DE-157             | Δ1-41 Δ <i>istR</i> :: <i>frt-kan-frt ΔruvAB</i> :: <i>cat</i> (P1 from GC-102 to B133)                                          | This study              |
| DE-222             | Δ1-41 Δ <i>istR</i> :: <i>frt-kan-frt</i> with 3xFLAG- <i>tisB</i>                                                               | [3]                     |
| <b>Plasmid</b>     | <b>Relevant features</b>                                                                                                         | <b>Source/Reference</b> |
| pSIM5              | λ red expression vector, pSC101 <i>ori</i> , <i>repA<sup>ts</sup></i> , Tet <sup>R</sup>                                         | [4]                     |
| pJV3H22            | IstR-1 transcribed from P <sub>L</sub> promoter in pZE12-luc, ColE1 <i>ori</i> , Amp <sup>R</sup>                                | [5]                     |
| pBAD- <i>syfp2</i> | pBAD with <i>syfp2</i> under control of P <sub>BAD</sub> , Amp <sup>R</sup>                                                      | This study              |
| pBAD+42            | pBAD with <i>tisB</i> from +42 to +354, Amp <sup>R</sup>                                                                         | [6]                     |
| pBAD3xFlag         | pBAD with <i>tisB</i> from +42 to +354, 3xFLAG tag inserted, Amp <sup>R</sup>                                                    | [6]                     |

**Table S2. Oligodeoxyribonucleotides used in this study.**

| Name           | Sequence (5' to 3')                                                    | Description                                   |
|----------------|------------------------------------------------------------------------|-----------------------------------------------|
| recB-KO-1      | GCAGCAAACAATGCCCCTGATGAGTGAAAAGAATGAG<br>TGAGCTCATATGAATATCCTCCTTAG    | chr. Deletion of <i>recB</i> with <i>cat</i>  |
| recB-KO-2      | TGTGCTCCACAGCTTCCAGTAATTGCTTTTGCAATTTTCAT<br>CTAGAGCTAACTAACTTGTAGGCTG | chr. Deletion of <i>recB</i> with <i>cat</i>  |
| recB-scr-1     | CCTGAAGGCTGGAAAGTGTG                                                   | screening of chr. <i>recB</i> deletion        |
| recB-scr-2     | ACATCCAGCGGGCGTAG                                                      | screening of chr. <i>recB</i> deletion        |
| ruvAB-KO-1     | CATACAGCATTATCTTTGATTTCATTACGCAGGAGCGTC<br>ATGCTCATATGAATATCCTCCTTAG   | chr. Deletion of <i>ruvAB</i> with <i>cat</i> |
| ruvAB-KO-2     | TATTGCCAGTGCCGGATGCGGCGGAGCGACCAATCCG<br>ACGCCTTTGAGTGAGCTGATAC        | chr. Deletion of <i>ruvAB</i> with <i>cat</i> |
| ruvAB-scr-1    | TCGCTGGATATCTATCCAGC                                                   | screening of chr. <i>ruvAB</i> deletion       |
| ruvAB-scr-2    | CGAACAGCGTCGCATCAG                                                     | screening of chr. <i>ruvAB</i> deletion       |
| dinB-yfp-1     | TGACCCGCAAATGGAAAGACAACCTGGTGCTGGGATTA<br>TGACCGAATTCAGAGAAAGAGGAG     | <i>dinB-syfp2</i> fusion with <i>cat</i>      |
| dinB-yfp-2     | CTCATAATAATGCACACCAGAATATACATAATAGTATAC<br>ACTAGAGCTAACTAACTTGTAGGCTG  | <i>dinB-syfp2</i> fusion with <i>cat</i>      |
| dinB-yfp-scr1  | CAGCAAACCACCCAGGAG                                                     | screening of <i>dinB-syfp2</i> fusion         |
| dinB-yfp-scr2  | GAACCGCAACCGGTTGATC                                                    | screening of <i>dinB-syfp2</i> fusion         |
| sulA_yfp_out   | CAACTCTGGTTAACACCGC                                                    | screening of <i>sulA-syfp2</i> fusion         |
| sYFP2_out      | CGCGTCTTGTAGTTACCG                                                     | screening of <i>sulA-syfp2</i> fusion         |
| topo-fw-Hind   | TATAAAGCTTTGTTTTGGCGGATGAGAGA                                          | pBAD amplification, HindIII                   |
| topo-rev-Eco   | TATAGAATTCTGGAGAAACAGTAGAGAGTTG                                        | pBAD amplification, EcoRI                     |
| syfp2-for-Eco  | TATAGAATTCAGAGAAAGAGGAGAAATAC                                          | <i>syfp2</i> amplification, EcoRI             |
| syfp2-rev-Hind | TATAAAGCTTATTATTTATACAGCTCATCC                                         | <i>syfp2</i> amplification, HindIII           |
| yfp-1-alt      | TGAGGGTGAAGGTGACGCAA                                                   | qRT-PCR against <i>syfp2</i>                  |
| yfp-2-alt      | AACGCGCGAAACACTGAACG                                                   | qRT-PCR against <i>syfp2</i>                  |
| cysG-1-new     | CGGACCGTGTTTTTCGTCG                                                    | qRT-PCR against <i>cysG</i>                   |
| cysG-2-new     | ACGGATCGCCACCTTTCA                                                     | qRT-PCR against <i>cysG</i>                   |
| hcaT-1         | ATCCGTCCGACGATTTCAG                                                    | qRT-PCR against <i>hcaT</i>                   |
| hcaT-2         | CCGTAATAGGCCGCATGT                                                     | qRT-PCR against <i>hcaT</i>                   |

## Supporting references

1. Dörr, T.; Vulic, M.; Lewis, K. Ciprofloxacin causes persister formation by inducing the TisB toxin in *Escherichia coli*. *PLoS Biol* **2010**, *8*, e1000317.
2. Berghoff, B.A.; Hoekzema, M.; Aulbach, L.; Wagner, E.G.H. Two regulatory RNA elements affect TisB-dependent depolarization and persister formation. *Mol. Microbiol.* **2017**, *103*, 1020–1033.
3. Edelmann, D.; Oberpaul, M.; Schäberle, T.F.; Berghoff, B.A. Post-transcriptional deregulation of the *tisB/istR-1* toxin–antitoxin system promotes SOS-independent persister formation in *Escherichia coli*. *Environ. Microbiol. Rep.* **2021**, *13*, 159–168.
4. Datta, S.; Costantino, N.; Court, D.L. A set of recombineering plasmids for gram-negative bacteria. *Gene* **2006**, *379*, 109–115.
5. Vogel, J.; Argaman, L.; Wagner, E.G.H.; Altuvia, S. The small RNA IstR inhibits synthesis of an SOS-induced toxic peptide. *Curr. Biol.* **2004**, *14*, 2271–2276.
6. Unoson, C.; Wagner, E.G.H. A small SOS-induced toxin is targeted against the inner membrane in *Escherichia coli*. *Mol. Microbiol.* **2008**, *70*, 258–270.
